# Supplementary material for: Enhanced microwave absorption of ZnO coated with Ni nanoparticles produced by atomic layer deposition
Source: Royal Society of Chemistry journal article supplement (doi:10.1039/c4ta06053a), 2014-12-11
Supplement: c4ta06053a1.pdf [file c4ta06053a1.pdf]

## Electronic Supplementary Information

Enhanced microwave absorption of ZnO coated with Ni nanoparticles  
produced by atomic layer deposition

Guizhen Wang,<sup>a</sup> Xiang Peng,<sup>a</sup> Lei Yu,<sup>a</sup> Gengping Wan,<sup>\*a</sup> Shiwei Lin<sup>\*a</sup> and Yong  
Qin<sup>\*b</sup>

<sup>a</sup> Dr. G. Z. Wang, X. E. Peng, L. Yu, G. P. Wan and Prof. S. W. Lin  
Key Laboratory of Chinese Education Ministry for Tropical Biological Resources,  
Hainan University, Haikou 570228, China  
E-mail: [wangengping001@163.com](mailto:wangengping001@163.com) (G. P. Wan)  
E-mail: [lsu00@hotmail.com](mailto:lsu00@hotmail.com) (S. W. Lin)

<sup>b</sup> Prof. Y. Qin  
State Key Laboratory of Coal Conversion, Institute of Coal Chemistry, Chinese  
Academy of Sciences, Taiyuan 030001, China  
E-mail: [qinyong@sxicc.ac.cn](mailto:qinyong@sxicc.ac.cn) (Y. Qin)

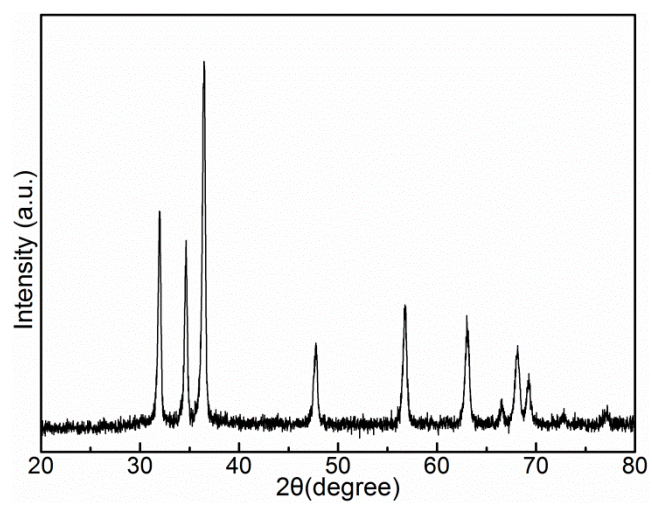

**Fig. S1** XRD pattern of ZnO@NiO composites.

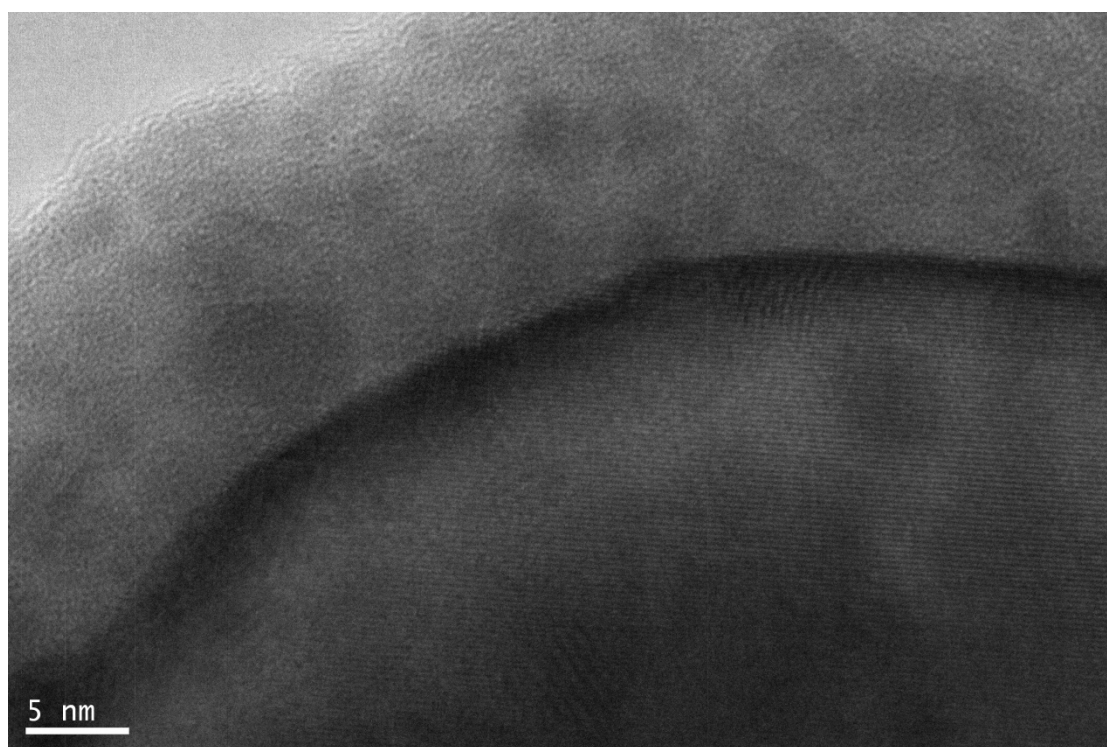

**Fig. S2** HRTEM image of ZnO@NiO.

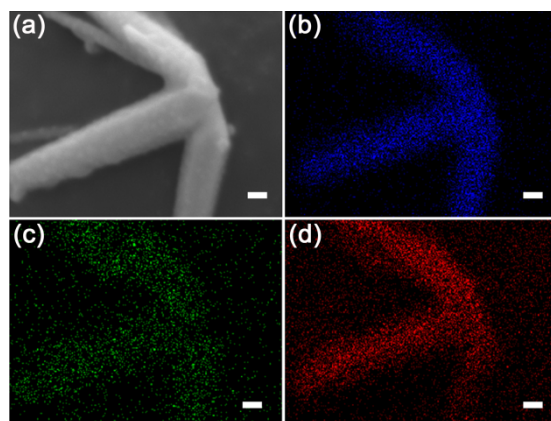

**Fig. S3** (a) SEM of the ZnO@NiO and corresponding elemental mapping images of (b) Zn, (c) Ni and (d) O. Scale bar: 600 nm.

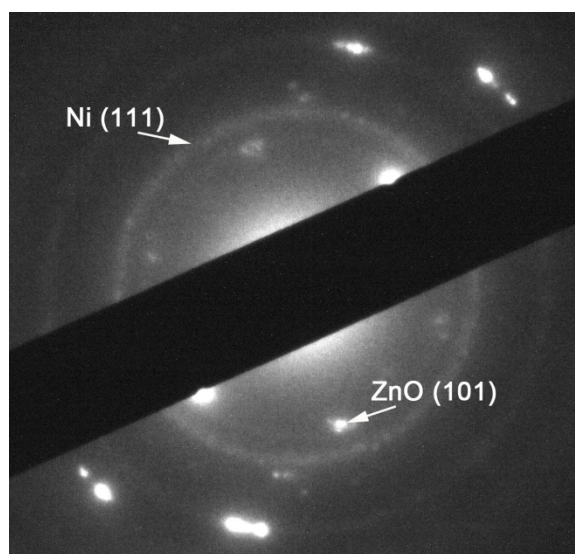

**Fig. S4** SAED pattern of an individual ZnO@Ni nanorod.

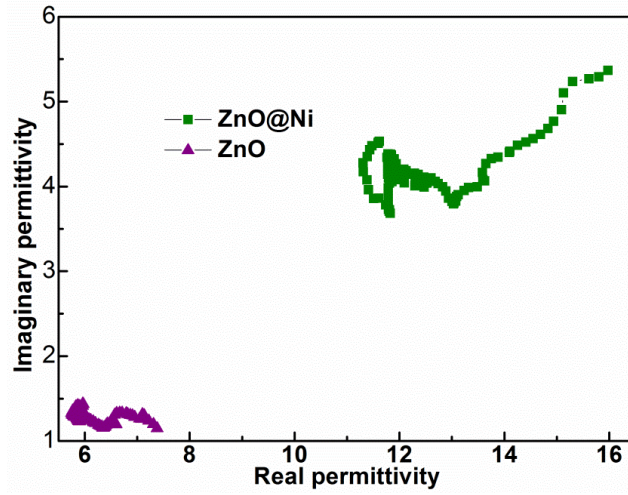

**Fig. S5** Typical Cole–Cole semicircles ( $\epsilon''$  versus  $\epsilon'$ ) for ZnO and ZnO@Ni composites in the frequency range of 2–18 GHz.

Conventionally the relaxation process which can be described by the Cole-Cole semicircle has an important influence on permittivity behaviors of microwave absorption materials. According to the Debye dipolar relaxation,<sup>1</sup> the relative complex permittivity ( $\epsilon_r$ ) can be expressed by the following equation,

$$\epsilon_r = \epsilon' + i\epsilon'' = \epsilon_\infty + \frac{\epsilon_s - \epsilon_\infty}{1 + i\omega\tau_0} \quad (1)$$

where  $\tau_0$ ,  $\epsilon_s$ , and  $\epsilon_\infty$  are the relaxation time, the static dielectric constant, and the dielectric constant at infinite frequency, respectively. From eq 1, it can be deduced that

$$\epsilon' = \epsilon_\infty + \frac{\epsilon_s - \epsilon_\infty}{1 + (\omega\tau_0)^2} \quad (2)$$

$$\epsilon'' = \frac{\omega\tau_0(\epsilon_s - \epsilon_\infty)}{1 + (\omega\tau_0)^2} \quad (3)$$

According to eqs 2 and 3, the relationship between  $\epsilon'$  and  $\epsilon''$  can be further deduced,

$$\left(\epsilon' - \frac{\epsilon_s + \epsilon_\infty}{2}\right)^2 + (\epsilon'')^2 = \left(\frac{\epsilon_s - \epsilon_\infty}{2}\right)^2 \quad (4)$$

Thus the plot of  $\epsilon'$  versus  $\epsilon''$  would be a single semicircle, which is usually defined as the Cole-Cole semicircle, and each semicircle corresponds to one Debye relaxation process. Plots of  $\epsilon''$  versus  $\epsilon'$  for ZnO and ZnO@Ni composites are shown in Fig. S5, where four superimposed Cole-Cole semicircles are found for the ZnO@Ni sample.

#### Reference

[1] Frenkel, J.; Doefman, J. Spontaneous and induced magnetisation in ferromagnetic bodies. *Nature* 1930, 126, 274–275.

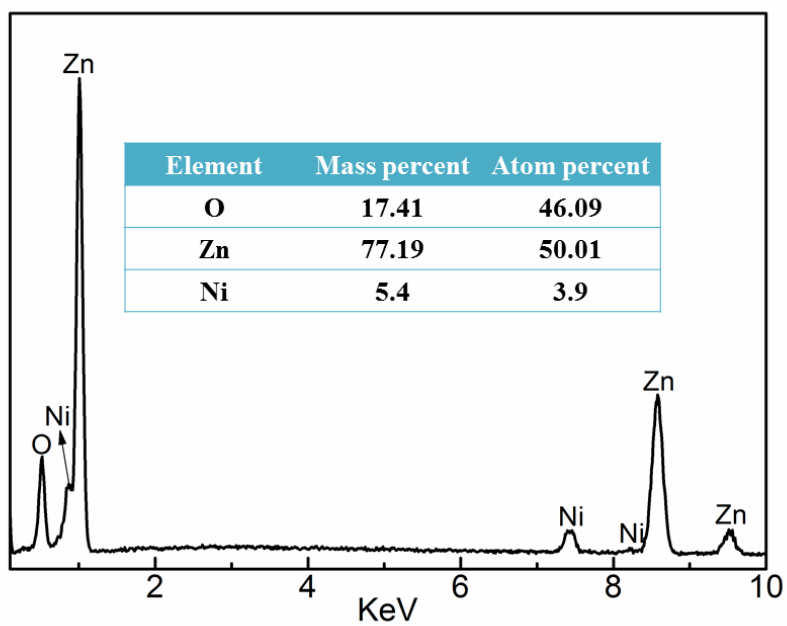

**Fig. S6** EDS of ZnO@Ni.
